# Supplementary material for: Genotype, extrapyramidal features, and severity of variant ataxia‐telangiectasia
Source: PubMed Central journal article supplement (PMC6590299; doi:10.1002/ana.25394), 2019-01-29
Supplement: ANA-85-170-s001.pdf [file ANA-85-170-s001.pdf]

**SUPPLEMENTARY TABLE 1. ATM Mutations, Protein Changes, and ATM Kinase Activity in 57 Variant Ataxia-Telangiectasia Patients**

| Patient (sex, age)                                                                                                          | ATM Mutation 1                                | ATM Mutation 2                                           | Neur |
|-----------------------------------------------------------------------------------------------------------------------------|-----------------------------------------------|----------------------------------------------------------|------|
| Genetic group 1: some normal ATM protein, with residual kinase activity present, attributed to a leaky splice site mutation |                                               |                                                          |      |
| 1 (F,38)                                                                                                                    | c.5763-1050A > G, p.(Pro1922fs)               | duplication of ATM exons 53-61                           | B    |
| 2 (M,41) (Ref 21)                                                                                                           | c.5763-1050A > G, p.(Pro1922fs)               | c.5763-1050A > G, p.(Pro1922fs)                          | A    |
| 3 (F,36)                                                                                                                    | c.5763-1050A > G, p.(Pro1922fs)               | c.9022C > T, p.(Arg3008Cys)                              | B    |
| 4 (M,47)                                                                                                                    | c.5763-1050A > G, p.(Pro1922fs)               | c.9022C > T, p.(Arg3008Cys)                              | B    |
| 5 (F,55)* (Ref 15)                                                                                                          | c.5763-1050A > G, p.(Pro1922fs)               | c.9139C > T, p.(Arg3047Ter)                              | B    |
| 6 (F,55)                                                                                                                    | c.5763-1050A > G, p.(Pro1922fs)               | c.2T > C, p.(Met1Thr)                                    | B    |
| 7 (F,20)                                                                                                                    | c.5763-1050A > G, p.(Pro1922fs)               | c.1563_1564delAG, p.(Glu522IlefsTer21)                   | B    |
| 8 (F,40)*                                                                                                                   | c.5763-1050A > G, p.(Pro1922fs)               | c.6136delC, p.(Leu2046fsTer1)                            | A    |
| 9 (M,38)*                                                                                                                   | c.5763-1050A > G, p.(Pro1922fs)               | c.6199-6_6227del35, p.(Ala2067GlnfsTer10)                | B    |
| 10 (F,50)                                                                                                                   | c.5763-1050A > G, p.(Pro1922fs)               | c.8418 + 2_5delTGAG,<br>p.(Val2757_Met2806del)           | B    |
| 11 (M,49)                                                                                                                   | c.5763-1050A > G, p.(Pro1922fs)               | c.8786 + 1G > A, p.(Gly2891fs)                           | A    |
| 12 (M,21)                                                                                                                   | c.5763-1050A > G, p.(Pro1922fs)               | c.8491_8497del7, p.(Phe2831ThrfsTer24)                   | B    |
| 13 (M,60)*                                                                                                                  | c.5763-1050A > G, p.(Pro1922fs)               | c.2284-2285delCT, p.(Leu762fs)                           | A    |
| 14 (F,22)*                                                                                                                  | c.5763-1050A > G, p.(Pro1922fs)               | c.6198 + 1G > A, p.(Leu2033ProfsTer15)                   | B    |
| 15 (M,31)                                                                                                                   | c.8418 + 681A > G,<br>p.(Glu2807ValfsTer4)    | c.1564_1565delGA, p.(Glu522IlefsTer43)                   | B    |
| 16 (M,45)                                                                                                                   | c.1066-6T > G, Loss of exon 9                 | c.9023G > A, p.(Arg3008His)                              | A    |
| 17 (F,31)                                                                                                                   | c.6807G > A, Loss of exon 46                  | c.1158delG, p.(Lys387fs)                                 | B    |
| 18a (F,43), 18b (M,40)                                                                                                      | c.331 + 5G > A                                | c.331 + 5G > A, exon 4 splice donor defect               | A, A |
| 19 (F,48)* (Ref 4,7)                                                                                                        | c.496 + 5G > A,<br>p.Arg111_Glu166del55insLys | c.7875_7876delTGinsGC, p.<br>Asp2625_Ala2626delinsGluPro | B    |
| Genetic group 2: mutant ATM protein present with residual kinase activity from a missense mutation                          |                                               |                                                          |      |
| 20 (F,27)                                                                                                                   | c.7271T > G, p.(Val2424Gly)                   | c.103C > T, p.(Arg35Ter)                                 | C    |
| 21 (F,48)*                                                                                                                  | c.7271T > G, p.(Val2424Gly)                   | c.8266A > T, p.(Lys2756Ter)                              | B    |
| 22 (M,26)                                                                                                                   | c.7271T > G, p.(Val2424Gly)                   | c.3G > T, p.(Met1Ile)                                    | A    |
| 23a (M,47), 23b (M,36)                                                                                                      | c.7271T > G, p.(Val2424Gly)                   | c.8269-loss of exon 57 by MLPA                           | A, A |
| 24 (M,41) (Ref 33)                                                                                                          | c.743G > T, p.(Arg248Leu)                     | c.8266A > T, p.(Lys2756Ter)                              | C    |
| 25 (M,52) (Ref 32)                                                                                                          | c.743G > T, p.(Arg248Leu)                     | c.5623C > T, p.(Arg1875Ter)                              | C    |
| 26 (F,27) (Ref 17)                                                                                                          | c.590G > A, p.(Gly197Glu)                     | c.590G > A, p.(Gly197Glu)                                | C    |
| 27 (F,56c) (Ref 31)                                                                                                         | c.8672G > A, p.(Gly2891Asp)                   | c.1A > G, p.(Met1Val)                                    | A    |
| 28 (F,25)                                                                                                                   | c.8480T > G, p.(Phe2827Cys)                   | c.1564_1565delAG, p.(Glu522IlefsTer21)                   | B    |
| 29a (F,50c), 29b (F,47c),<br>29c (F,41c)                                                                                    | c.7184A > T, p.(Asp2395Val)                   | c.6490G > T, p.(Glu2164Ter)                              | BBB  |

**SUPPLEMENTARY TABLE 1. Continued**

| Patient (sex, age)                                                                                                  | ATM Mutation 1                              | ATM Mutation 2                                                                 | Neur |
|---------------------------------------------------------------------------------------------------------------------|---------------------------------------------|--------------------------------------------------------------------------------|------|
| 30 (F,32)                                                                                                           | c.875C > T, p.(Pro292Leu)                   | c.5129_5763-1060del9263<br>p.(Glu1669AspfsTer16) deletion<br>of exons 35 to 38 | A    |
| 31 (M,21)                                                                                                           | c.875C > T, p.(Pro292Leu)                   | c.8494C > T, p.(Arg2832Cys)                                                    | B    |
| 32 (M,32)                                                                                                           | c.6115G > A, p.(Glu2039Lys)                 | c.8609_8610delAT,<br>p.(Asp2870GlufsTer10)                                     | C    |
| 33 (F,11)                                                                                                           | c.9103C > T, p.(Leu3035Phe)                 | c.9103C > T, p.(Leu3035Phe)                                                    | A    |
| 34 (M,13)(PD)                                                                                                       | c.7013T > C, p.(Leu2338Pro)                 | c.6056A > G, p.(Tyr2019Cys)                                                    | B    |
| 35 (M,15)                                                                                                           | c.8494C > T, p.(Arg2832Cys)                 | c.1844C > T, p.(Leu615Pro)                                                     | B    |
| 36 (F,40) (Ref 4,7)                                                                                                 | c.2909T > G, p.(Leu970Arg)                  | c.6908dupA, p.(Glu2304fs)                                                      | B    |
| 37a (M,39), 37b† (M,48),<br>37c† (M,48)                                                                             | c.3136C > T, p.(Leu1046Phe)<br>(Ref 4,7,18) | c.7622T > G, p.(Leu2541Arg)                                                    | CCC  |
| 38 (F,42) (Ref 4,7)                                                                                                 | c.8147T > C, p.(Val2716Ala)                 | c.5932G > T, p.(Glu1978Ter)                                                    | C    |
| 39† (F,47)* (Ref 4,7)                                                                                               | c.8147T > C, p.(Val2716Ala)                 | c.1391_1395delTGTTG,<br>p.(Leu464SerfsTer21)                                   | B    |
| 40 (F,47)* (Ref 4,7)                                                                                                | c.8147T > C, p.(Val2716Ala)                 | c.717_720delCCTC, p.(Val240fs)                                                 | B    |
| 41 (F,58c) (Ref 4,7)                                                                                                | c.8147T > C, p.(Val2716Ala)                 | c.2922-1G > A, p.(Asn975_Trp1026del)                                           | B    |
| Genetic group 3: patients with mutations in initiator methionine, with no likely kinase activity                    |                                             |                                                                                |      |
| 42 (F,23)(PD)                                                                                                       | c.2T > C, p.(Met1Thr)                       | c.9139C > T, p.(Arg3047Ter)                                                    | B    |
| 43 (F,42)*                                                                                                          | c.2T > C, p.(Met1Thr)                       | c.640_640delT, p.(Ser214ProfsTer16)                                            | A    |
| 44 (M,22)*                                                                                                          | c.2T > C; p.(Met1Thr)                       | c.7665delinsGTGA, p.His2555GlnfsX2                                             | A    |
| Genetic group 4: patients with residual ATM kinase activity with one mutation not detected or incompletely resolved |                                             |                                                                                |      |
| 45 (F,30)                                                                                                           | c.5644C > T, p.(Arg1882X)                   | Not detected                                                                   | B    |
| 46a (M,56), 46b (M,54)                                                                                              | c.170G > A, p.(Trp57Ter)                    | c.3403del174(del exon 24),<br>incompletely resolved                            | A, A |
| 47 (F,26)                                                                                                           | c.387delA, p.(Asp130fsTer23)                | Skipping exons 31 and 32,<br>incompletely resolved                             | B    |
| 48 (F,31c)                                                                                                          | c.2466 + 6 T > A complex,<br>unresolved     | Not detected                                                                   | A    |
| 49 (F,15)                                                                                                           | c.2731dupG, p.(Ala911GlyfsTer9)             | Possible splice mutation<br>involving exons 33 and 34                          | A    |
| 50 (F,45)* (Ref 4,7)                                                                                                | c.8147T > C, p.(Val2716Ala)                 | Not detected                                                                   | C    |

Ref = reference to previous publication, † = individual deceased, c = individual has offspring, \* = kinase activity not tested, Neur = neurology group, PD = possibly just detectable kinase activity.  
ATM = ataxia telangiectasia-mutated.

**SUPPLEMENTARY TABLE 2. Neurological Features and Malignancies in Each Neurological Phenotypic Group**

|                            | <b>A: Cerebellar Ataxia and/or Peripheral Neuropathy With Minimal or No Extrapyramidal Involvement</b> | <b>B: Cerebellar Ataxia and/or Peripheral Neuropathy Plus Additional Extrapyramidal Features</b> | <b>C: Extrapyramidal Signs Without Significant Ataxia and/or Peripheral Neuropathy</b>        |
|----------------------------|--------------------------------------------------------------------------------------------------------|--------------------------------------------------------------------------------------------------|-----------------------------------------------------------------------------------------------|
| No. of individuals         | 19                                                                                                     | 28                                                                                               | 10                                                                                            |
| Mean age at assessment     | 38.8 years (range, 11–56)                                                                              | 35.7 years (range, 13–56)                                                                        | 39.8 years (range, 27–52)                                                                     |
| Mean disease duration (yr) | 32                                                                                                     | 30                                                                                               | 28                                                                                            |
| Onset                      | Early 16: Late 3                                                                                       | Early 25: Late 3                                                                                 | Early 5: Late 5                                                                               |
| Progression                | Slow: 5                                                                                                | Slow: 9                                                                                          | Slow: 7                                                                                       |
|                            | Slow/Mod: 4                                                                                            | Slow/Mod: 2                                                                                      | Slow/Mod: 1                                                                                   |
|                            | Moderate: 7                                                                                            | Moderate: 9                                                                                      | Moderate: 1                                                                                   |
|                            | Rapid: 3                                                                                               | Rapid: 8                                                                                         | Rapid: 0                                                                                      |
| Current severity           | Mild: 3                                                                                                | Mild: 6                                                                                          | Mild: 8                                                                                       |
|                            | Moderate: 10                                                                                           | Moderate: 15                                                                                     | Moderate: 1                                                                                   |
|                            | Severe: 6                                                                                              | Severe: 4                                                                                        | Severe: 0                                                                                     |
|                            |                                                                                                        | Not documented: 3                                                                                | Not documented: 1                                                                             |
| Mean A-T NEST              | 61.0 (range, 36–95)                                                                                    | 58.2 (range, 34–87)                                                                              | 64.3 (range, 57–72)                                                                           |
| Mean SARA                  | 26.0 (range, 4–38)                                                                                     | 22.1 (range, 6–34)                                                                               | 11.6 (range, 6–21)                                                                            |
| Eye movements              | Normal: 1                                                                                              | Normal: 4                                                                                        | Normal: 6                                                                                     |
|                            | Mildly abnormal: 6                                                                                     | Mildly abnormal: 12                                                                              | Mildly abnormal: 2                                                                            |
|                            | Moderate/severe oculomotor dyspraxia: 11                                                               | Moderate/severe oculomotor dyspraxia: 12                                                         | Moderate/severe oculomotor dyspraxia: 2                                                       |
| Neurophysiology            | N = 12                                                                                                 | N = 14                                                                                           | N = 8                                                                                         |
|                            | Normal neurophysiology studies: 1                                                                      | Axonal sensorimotor neuropathy: 10                                                               | Normal neurophysiology studies: 1                                                             |
|                            | Axonal sensorimotor neuropathy: 8                                                                      | Axonal sensorimotor neuropathy and likely/possible spinal muscular atrophy: 4                    | Axonal sensorimotor neuropathy: 3                                                             |
|                            | Axonal sensorimotor neuropathy and likely spinal muscular atrophy: 3                                   |                                                                                                  | Axonal peripheral neuropathy and affected motor neurons: 3<br>Affected motor neurones only: 1 |
| Neurological treatment     | No specific neurological treatment relating to A-T: 14                                                 | No specific neurological treatment relating to A-T: 16                                           | No specific treatment relating to A-T: 6                                                      |

**SUPPLEMENTARY TABLE 2. Continued**

|            | <b>A: Cerebellar Ataxia and/or Peripheral Neuropathy With Minimal or No Extrapramidal Involvement</b> | <b>B: Cerebellar Ataxia and/or Peripheral Neuropathy Plus Additional Extrapramidal Features</b> | <b>C: Extrapramidal Signs Without Significant Ataxia and/or Peripheral Neuropathy</b> |
|------------|-------------------------------------------------------------------------------------------------------|-------------------------------------------------------------------------------------------------|---------------------------------------------------------------------------------------|
|            | Amitriptyline for painful neuropathy: 1                                                               | Single agents:                                                                                  | Deep brain stimulation: 1                                                             |
|            | Propranolol and primidone for tremors: 1                                                              | Madopar: 1                                                                                      | Botulinum toxin injections: 1                                                         |
|            | Clonazepam and baclofen: 1                                                                            | Trihexiphenidyl: 2                                                                              | Botulinum toxin injections and clonazepam: 1                                          |
|            | Amitriptyline and oxybutynin: 1                                                                       | Sinemet plus: 2                                                                                 | Baclofen and benzhexol: 1                                                             |
|            |                                                                                                       | Baclofen: 1                                                                                     |                                                                                       |
|            |                                                                                                       | Oxybutynin (for drooling): 1                                                                    |                                                                                       |
|            |                                                                                                       | Leviteracitam: 1                                                                                |                                                                                       |
|            |                                                                                                       | Two agents:                                                                                     |                                                                                       |
|            |                                                                                                       | Propranolol and primidone: 1                                                                    |                                                                                       |
|            |                                                                                                       | Pregabalin and amantadine: 1                                                                    |                                                                                       |
|            |                                                                                                       | Amifampridine and trihexiphenidyl: 1                                                            |                                                                                       |
|            |                                                                                                       | Four agents:                                                                                    |                                                                                       |
|            |                                                                                                       | clonazepam, amantadine, pregabalin, trihexyphenidyl                                             |                                                                                       |
| Malignancy | Breast cancer 43y                                                                                     | Breast cancers 29y, 43y                                                                         | Breast cancers 28y, 33y                                                               |
|            | Dermatofibroma 29y                                                                                    | Neuroendocrine tumour 48y                                                                       | Prostate cancer 52y                                                                   |
|            | Germ cell tumour 11y                                                                                  | T-cell non-Hodgkin's lymphoma 2y                                                                | Pancreatic cancer died 48y                                                            |
|            | ALL 9y                                                                                                | CLL died 47 years                                                                               | ALL died 51 years                                                                     |
|            |                                                                                                       | CML 39y                                                                                         |                                                                                       |

ALL = acute lymphoblastic leukemia; A-T NEST = Ataxia-Telangiectasia Neurological Examination Scale Toolkit; CLL = chronic lymphocytic leukemia; CML = chronic myeloid leukemia; SARA = Scale for Assessment and Rating of Ataxia.

**SUPPLEMENTARY TABLE 3. Comparison of Clinical Features in Individuals Either With One or More Missense Mutations Which Produce Mutant Protein With Residual Kinase Activity or With a Leaky Splice Site Mutation Also Expressing ATM Protein With Activity**

|                                                                                   | <b>&gt; = 1 Missense Mutation<br/>Producing Mutant Protein With<br/>Retained ATM Kinase Activity<br/>28 individuals</b> | <b>Leaky Splice Site Mutation<br/>Producing Protein With<br/>Retained ATM Kinase Activity (1)<br/>29 individuals</b> |
|-----------------------------------------------------------------------------------|-------------------------------------------------------------------------------------------------------------------------|----------------------------------------------------------------------------------------------------------------------|
| <b>Demographic features</b>                                                       |                                                                                                                         |                                                                                                                      |
| Male/female                                                                       | 11/17                                                                                                                   | 12/17                                                                                                                |
| Mean age (range)                                                                  | 38 (13–58)                                                                                                              | 37 (15–56)                                                                                                           |
| Median age at onset (range)                                                       | 3 (0.5–44.0)                                                                                                            | 3 (1–22)                                                                                                             |
| Median age at diagnosis (range)                                                   | 28 (2–47)                                                                                                               | 16 (3.5–44.0)                                                                                                        |
| <b>Neurological features</b>                                                      |                                                                                                                         |                                                                                                                      |
| Neurology group A/B/C                                                             | 6/12/10                                                                                                                 | 13/16/0                                                                                                              |
| No. with wheelchair/still ambulant                                                | 16/12                                                                                                                   | 26/3                                                                                                                 |
| Median age at first wheelchair among users (range)                                | 30.5 years (8–51)                                                                                                       | 16 years (8–40)                                                                                                      |
| Cross-sectional Clinical Neurological Disease Severity (mild/moderate/severe)     | 13/10/2 (not recorded in 3)                                                                                             | 4/16/8 (not recorded in 1)                                                                                           |
| Median SARA                                                                       | 17                                                                                                                      | 24.5                                                                                                                 |
| Median AT-NEST                                                                    | 61.5                                                                                                                    | 56                                                                                                                   |
| Peripheral neuropathy (present/absent)                                            | 21/5 (not recorded in 2)                                                                                                | 25/3 (not recorded in 1)                                                                                             |
| Eye movements (moderate-to-severe oculomotor dyspraxia/mild abnormalities/normal) | 4/13/11                                                                                                                 | 21/7/1                                                                                                               |
| <b>Non-neurological features</b>                                                  |                                                                                                                         |                                                                                                                      |
| Conjunctival telangiectasia (present/absent)                                      | 14/12 (1 not documented)                                                                                                | 21/8                                                                                                                 |
| CT chest                                                                          | Bronchiectasis 3                                                                                                        | Bronchiectasis 3                                                                                                     |
|                                                                                   | Normal findings 9                                                                                                       | Normal findings 21                                                                                                   |
|                                                                                   | intrapulmonary nodules 1                                                                                                | Emphysema 1                                                                                                          |
|                                                                                   | Not done 12                                                                                                             | Patchy air trapping 1                                                                                                |
|                                                                                   |                                                                                                                         | Not done 3                                                                                                           |
| Personal history of malignancy                                                    | Breast cancer (4 patients)                                                                                              | Breast cancer                                                                                                        |
|                                                                                   | CML                                                                                                                     | T-cell ALL                                                                                                           |
|                                                                                   | CLL                                                                                                                     | Dermatofibrosarcoma protuberans                                                                                      |
|                                                                                   | ALL                                                                                                                     |                                                                                                                      |
|                                                                                   | Non-Hodgkin's lymphoma                                                                                                  |                                                                                                                      |
|                                                                                   | Pancreatic cancer                                                                                                       |                                                                                                                      |
|                                                                                   | Germ-cell tumor                                                                                                         |                                                                                                                      |
|                                                                                   | Prostate cancer                                                                                                         |                                                                                                                      |

**SUPPLEMENTARY TABLE 3. Continued**

|  | <b>&gt; = 1 Missense Mutation<br/>Producing Mutant Protein With<br/>Retained ATM Kinase Activity<br/>28 individuals</b> | <b>Leaky Splice Site Mutation<br/>Producing Protein With<br/>Retained ATM Kinase Activity (1)<br/>29 individuals</b> |
|--|-------------------------------------------------------------------------------------------------------------------------|----------------------------------------------------------------------------------------------------------------------|
|--|-------------------------------------------------------------------------------------------------------------------------|----------------------------------------------------------------------------------------------------------------------|

| <b>Laboratory features</b>                       |                   |                   |
|--------------------------------------------------|-------------------|-------------------|
| Mean alpha-fetoprotein, µg/l (range)             | 203 (10–600)      | 118 (2–332)       |
| Chromosomal radio-sensitivity<br>(raised/normal) | 16/6 (6 not done) | 17/9 (3 not done) |

These also include the 3 group 3 patients.

ALL = acute lymphoblastic leukemia; ATM = ataxia telangiectasia-mutated; A-T NEST = Ataxia-Telangiectasia Neurological Examination Scale Toolkit; CLL = chronic lymphocytic leukemia; CML = chronic myeloid leukemia; CT = computed tomography; SARA = Scale for Assessment and Rating of Ataxia.
